# Supplementary material for: Nurse-Led Strategy to Improve Blood Pressure and Cholesterol Level Among People With HIV: A Randomized Clinical Trial
Source: PubMed Central journal article supplement (PMC10915684; doi:10.1001/jamanetworkopen.2023.56445), 2024-03-05
Supplement: jamanetwopen-e2356445-s002.pdf [file jamanetwopen-e2356445-s002.pdf]

## Supplemental Online Content

Longenecker CT, Jones KA, Hileman CO, et al. Nurse-led strategy to improve blood pressure and cholesterol level among people with HIV: a randomized clinical trial. *JAMA Netw Open*. 2024;7(3):e2356445. doi:10.1001/jamanetworkopen.2023.56445

**eFigure 1.** Study Accrual

**eTable 1.** Characteristics of People with HIV Who Consented to Participate in EXTRA-CVD Compared to Those Who Declined Participation After an Initial Phone Screen

**eTable 2.** Patient Blood Pressure and Cholesterol Values at Baseline, Overall and by Treatment Arm

**eFigure 2.** Stacked Bar Chart of Blood Pressure Values at Baseline, by Anti-Hypertensive Treatment Status

**eTable 3.** Model-Estimated Outcome Means and Standard Errors or Proportions by Study Arm and Time Point

**eTable 4.** Testing Sex as a Moderator of the Intervention Effects on Outcomes by Including an Interaction Term Between Study Arm, Study Visit, and Sex, With Male Sex Compared to Female (Reference Group)

**eTable 5.** Testing ASCVD Risk as a Moderator of the Intervention Effects on Outcomes by Including an Interaction Term Between Study Arm, Study Visit, and ASCVD Risk, With High ASCVD Risk Compared to Low/Moderate Risk (Reference Group)

**eTable 6.** Testing Site as a Moderator of the Intervention Effects on Outcomes by Including an Interaction Term Between Study Arm, Study Visit, and Site, With Sites 2 and 3 Compared to Site 1 (Reference Group)

**eTable 7.** Intervention Effects Stratified by Treating Physician (EXTRA-CVD Investigator or Not)

**eTable 8.** Adverse Events by Treatment Arm

**eTable 9.** Sensitivity Analysis of Intervention Effects on Primary, Secondary, and Tertiary Outcomes, Adjusted for Baseline Covariates Associated With Attrition

This supplemental material has been provided by the authors to give readers additional information about their work.

**eFigure 1. Study Accrual**

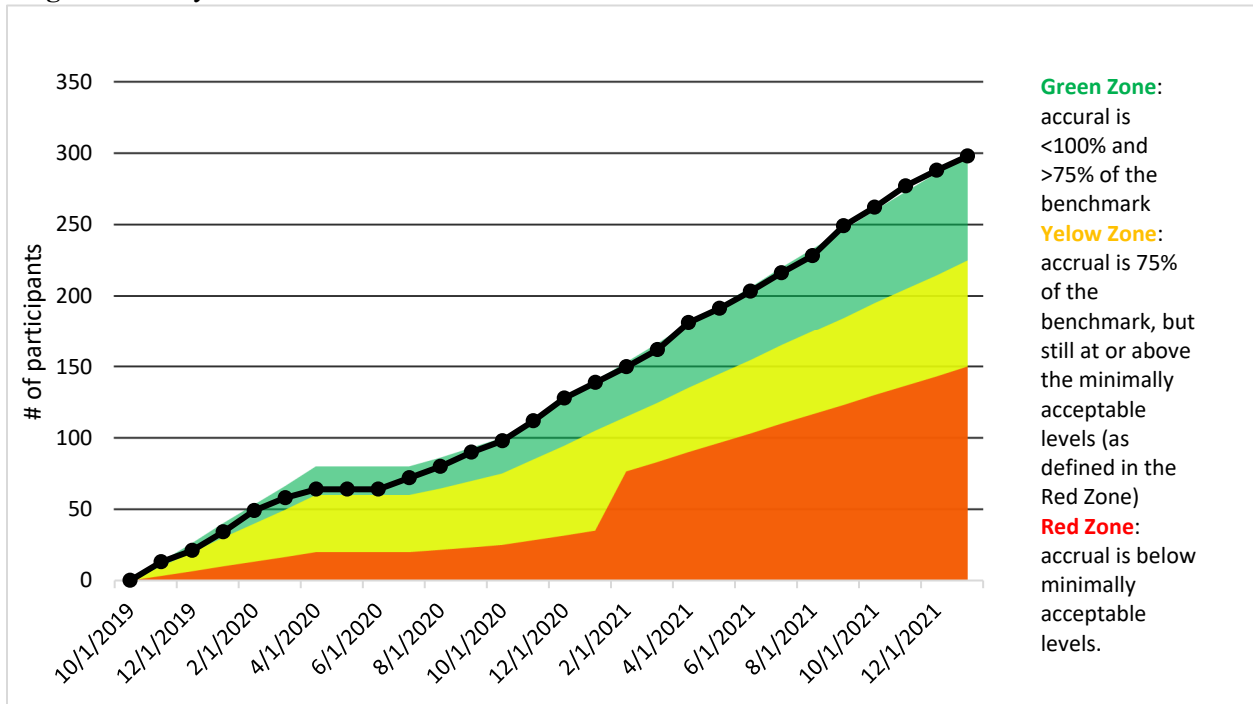

**eTable 1.** Characteristics of People with HIV Who Consented to Participate in EXTRA-CVD Compared to Those Who Declined Participation After an Initial Phone Screen

| Variable                          | Consented to participate in EXTRA-CVD | Did not consent to participate in EXTRA-CVD | p-value |
|-----------------------------------|---------------------------------------|---------------------------------------------|---------|
| N                                 | 299 <sup>b</sup>                      | 106                                         |         |
| <u>Demographics</u>               |                                       |                                             |         |
| Age (years), Mean (SD)            | 57.3 (9.6)                            | 53.4 (11.4)                                 | .003    |
| Age (years), Median (Q1, Q3)      | 59.0 (52.0, 64.0)                     | 56.0 (45.0, 62.0)                           | .003    |
| Gender                            |                                       |                                             | .29     |
| Male                              | 234 (78.3%)                           | 80 (75.5%)                                  |         |
| Female                            | 62 (20.7%)                            | 23 (21.7%)                                  |         |
| Transgender Male/Transman/FTM     | 1 (0.3%)                              | 0 (0.0%)                                    |         |
| Transgender Female/Transwoman/MTF | 2 (0.7%)                              | 1 (0.9%)                                    |         |
| Other gender                      | 0 (0.0%)                              | 1 (0.9%)                                    |         |
| Unreported                        | 0 (0.0%)                              | 1 (0.9%)                                    |         |
| Sex                               |                                       |                                             | .85     |
| Female                            | 62 (20.7%)                            | 23 (21.7%)                                  |         |
| Male                              | 232 (77.6%)                           | 82 (77.4%)                                  |         |
| Unreported                        | 5 (1.7%)                              | 1 (0.9%)                                    |         |
| Hispanic or Latino ethnicity      |                                       |                                             | .003    |
| Non-Hispanic                      | 281 (94.0%)                           | 101 (95.3%)                                 |         |
| Hispanic/Latino                   | 17 (5.7%)                             | 1 (0.9%)                                    |         |
| Unreported                        | 1 (0.3%)                              | 4 (3.8%)                                    |         |
| Race                              |                                       |                                             | .04     |
| African American/Black            | 181 (60.5%)                           | 65 (61.3%)                                  |         |
| American Indian/Alaskan Native    | 0 (0.0%)                              | 1 (0.9%)                                    |         |
| White                             | 100 (33.4%)                           | 35 (33.0%)                                  |         |
| Other race                        | 9 (3.0%)                              | 1 (0.9%)                                    |         |
| Multiracial                       | 7 (2.3%)                              | 0 (0.0%)                                    |         |
| Unknown                           | 2 (0.7%)                              | 4 (3.8%)                                    |         |

<sup>a</sup> This table includes all patients who were deemed eligible for EXTRA-CVD following the medical record review and participant screening. Demographic information was collected at the participant screening, as approved by the IRB.

<sup>b</sup> As shown in Figure 1 of the manuscript, n=299 is two higher than the n=297 who were included in the final analysis. One participant withdrew after consent but prior to randomization; another participant withdrew after randomization but prior to the baseline visit.

**eTable 2.** Patient Blood Pressure and Cholesterol Values at Baseline, Overall and by Treatment Arm

| <b>Variable</b>                             | <b>Overall<br/>N=297</b> | <b>Intervention<br/>N=149</b> | <b>Control<br/>N=148</b> |
|---------------------------------------------|--------------------------|-------------------------------|--------------------------|
| <u>Blood Pressure</u>                       |                          |                               |                          |
| Systolic blood pressure, Mean (SD)          | 135.0 (18.8)             | 135.9 (18.1)                  | 134.0 (19.5)             |
| Diastolic blood pressure, Mean (SD)         | 81.1 (12.1)              | 81.2 (12.2)                   | 81.0 (12.0)              |
| <u>Cholesterol</u>                          |                          |                               |                          |
| Total cholesterol, Mean (SD)                | 184.7 (46.1)             | 185.1 (45.3)                  | 184.4 (46.9)             |
| LDL, Mean (SD)                              | 111.8 (39.6)             | 111.5 (38.6)                  | 112.1 (40.6)             |
| HDL, Mean (SD)                              | 45.2 (14.5)              | 45.8 (14.7)                   | 44.7 (14.3)              |
| Non-HDL, Mean (SD)                          | 139.9 (44.6)             | 139.5 (44.6)                  | 140.3 (44.9)             |
| Triglycerides, Median (Q1, Q3) <sup>a</sup> | 121.0 (89.0, 184.0)      | 127.0 (95.0, 182.0)           | 112.0 (85.0, 191.0)      |

<sup>a</sup>Median (Q1, Q3) presented due to skewness of the data

**eFigure 2.** Stacked Bar Chart of Blood Pressure Values at Baseline, by Anti-Hypertensive Treatment Status

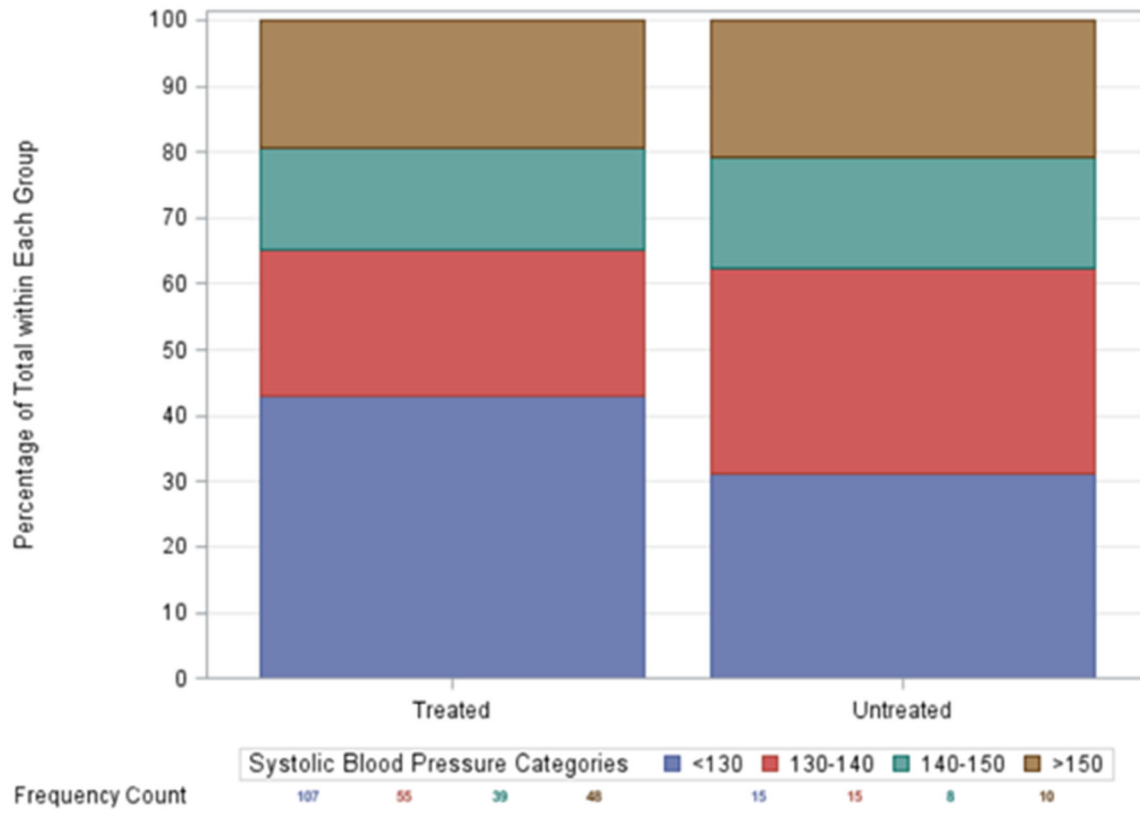

**eTable 3.** Model-Estimated Outcome Means and Standard Errors or Proportions by Study Arm and Time Point

| Outcomes                                            | Baseline                                        |                                            | 4 months                                        |                                            | 8 months                                        |                                            | 12 months                                       |                                            |
|-----------------------------------------------------|-------------------------------------------------|--------------------------------------------|-------------------------------------------------|--------------------------------------------|-------------------------------------------------|--------------------------------------------|-------------------------------------------------|--------------------------------------------|
|                                                     | Intervention estimate<br>Mean (SE) <sup>a</sup> | Control estimate<br>Mean (SE) <sup>a</sup> | Intervention estimate<br>Mean (SE) <sup>a</sup> | Control estimate<br>Mean (SE) <sup>a</sup> | Intervention estimate<br>Mean (SE) <sup>a</sup> | Control estimate<br>Mean (SE) <sup>a</sup> | Intervention estimate<br>Mean (SE) <sup>a</sup> | Control estimate<br>Mean (SE) <sup>a</sup> |
| <b>Primary outcome</b>                              |                                                 |                                            |                                                 |                                            |                                                 |                                            |                                                 |                                            |
| Systolic blood pressure, mm Hg                      | 134.9 (1.0)                                     | 134.9 (1.0)                                | 129.9 (1.5)                                     | 136.3 (1.5)                                | 129.3 (1.6)                                     | 133.0 (1.4)                                | 129.7 (1.5)                                     | 133.9 (1.4)                                |
| <b>Secondary outcome</b>                            |                                                 |                                            |                                                 |                                            |                                                 |                                            |                                                 |                                            |
| Non-HDL cholesterol, mg/dL                          | 139.9 (2.5)                                     | 139.9 (2.5)                                | 127.4 (3.5)                                     | 135.7 (3.4)                                | 120.9 (3.5)                                     | 131.9 (3.3)                                | 114.7 (3.5)                                     | 132.1 (3.3)                                |
| <b>Tertiary outcomes</b>                            |                                                 |                                            |                                                 |                                            |                                                 |                                            |                                                 |                                            |
| Hypertension treatment cascade <sup>b</sup>         | %                                               | %                                          | %                                               | %                                          | %                                               | %                                          | %                                               | %                                          |
| Untreated                                           | 10.8%                                           | 10.8%                                      | 7.8%                                            | 9.9%                                       | 3.2%                                            | 7.7%                                       | 5.7%                                            | 11.6%                                      |
| Treated                                             | 47.3%                                           | 47.3%                                      | 34.3%                                           | 45.7%                                      | 33.2%                                           | 45.3%                                      | 34.4%                                           | 48.6%                                      |
| At treatment goal                                   | 42.0%                                           | 42.0%                                      | 57.9%                                           | 44.4%                                      | 63.6%                                           | 47.0%                                      | 59.9%                                           | 39.8%                                      |
| Hypercholesterolemia treatment cascade <sup>b</sup> | %                                               | %                                          | %                                               | %                                          | %                                               | %                                          | %                                               | %                                          |
| Untreated                                           | 37.5%                                           | 37.5%                                      | 18.1%                                           | 27.5%                                      | 5.9%                                            | 16.3%                                      | 5.3%                                            | 27.1%                                      |
| Treated                                             | 20.5%                                           | 20.5%                                      | 15.7%                                           | 18.0%                                      | 9.0%                                            | 16.3%                                      | 3.6%                                            | 14.1%                                      |
| At treatment goal                                   | 42.0%                                           | 42.0%                                      | 66.3%                                           | 54.5%                                      | 85.1%                                           | 67.4%                                      | 91.1%                                           | 58.7%                                      |
| <b>Exploratory outcomes</b>                         |                                                 |                                            |                                                 |                                            |                                                 |                                            |                                                 |                                            |
| Total cholesterol, mg/dL                            | 184.9 (2.6)                                     | 184.9 (2.6)                                | 172.4 (3.6)                                     | 179.9 (3.5)                                | 165.8 (3.6)                                     | 176.4 (3.4)                                | 161.5 (3.6)                                     | 177.5 (3.4)                                |
| HDL cholesterol, mg/dL                              | 45.4 (0.9)                                      | 45.4 (0.9)                                 | 45.2 (1.1)                                      | 44.3 (1.0)                                 | 45.1 (1.1)                                      | 43.5 (1.0)                                 | 46.4 (1.1)                                      | 45.6 (1.0)                                 |
| LDL cholesterol, mg/dL                              | 111.5 (3.7)                                     | 111.5 (3.7)                                | 107.4 (5.9)                                     | 115.4 (5.7)                                | 93.3 (6.0)                                      | 104.7 (5.5)                                | 96.4 (5.9)                                      | 107.0 (5.6)                                |
| Triglycerides, mg/dL                                | 165.7 (7.7)                                     | 165.7 (7.7)                                | 152.6 (10.4)                                    | 163.7 (10.1)                               | 136.6 (10.5)                                    | 169.2 (9.8)                                | 133.6 (10.5)                                    | 161.6 (9.9)                                |

<sup>a</sup>Unless noted otherwise

<sup>b</sup>Categorized into one of the three mutually exclusive categories: untreated (regardless of whether it has been diagnosed), appropriately managed (at least one prescribed medication for hypertension/hypercholesterolemia), or at treatment goal (<130 systolic blood pressure for hypertension and <130 or <100 mg/dL, depending on risk score, for hypercholesterolemia)

**eTable 4.** Testing Sex as a Moderator of the Intervention Effects on Outcomes by Including an Interaction Term Between Study Arm, Study Visit, and Sex, With Male Sex Compared to Female (Reference Group)

| Outcomes                               | Intervention effect |                    |     |                   |     |                    |     |
|----------------------------------------|---------------------|--------------------|-----|-------------------|-----|--------------------|-----|
|                                        | Overall joint test  | 4 months           |     | 8 months          |     | 12 months          |     |
|                                        | p                   | Beta (95% CI)      | p   | Beta (95% CI)     | p   | Beta (95% CI)      | p   |
| <b>Primary outcome</b>                 |                     |                    |     |                   |     |                    |     |
| Systolic blood pressure, mm Hg         | .06                 | 11.8 (2.0, 21.6)   | .02 | 9.6 (-0.1, 19.3)  | .05 | 5.9 (-3.8, 15.5)   | .23 |
| <b>Secondary outcome</b>               |                     |                    |     |                   |     |                    |     |
| Non-HDL cholesterol, mg/dL             | .70                 | -11.1 (-31.6, 9.4) | .29 | 0.1 (-20.1, 20.4) | .99 | 0.4 (-19.9, 20.7)  | .97 |
| <b>Tertiary outcomes</b>               |                     |                    |     |                   |     |                    |     |
| Hypertension treatment cascade         | .81                 |                    |     |                   |     |                    |     |
| Treated                                |                     | 1.4 (0.1, 16.1)    | .77 | 0.5 (0.0, 9.0)    | .61 | 0.5 (0.0, 6.5)     | .60 |
| At treatment goal                      |                     | 0.4 (0.0, 4.8)     | .49 | 0.3 (0.0, 4.6)    | .35 | 0.8 (0.1, 9.2)     | .85 |
| Hypercholesterolemia treatment cascade | .80                 |                    |     |                   |     |                    |     |
| Treated                                |                     | 1.9 (0.1, 34.7)    | .68 | 0.6 (0.0, 14.3)   | .73 | 0.1 (0.0, 3.0)     | .20 |
| At treatment goal                      |                     | 4.2 (0.3, 61.5)    | .30 | 1.2 (0.1, 18.2)   | .90 | 0.5 (0.0, 6.7)     | .56 |
| <b>Exploratory outcomes</b>            |                     |                    |     |                   |     |                    |     |
| Total cholesterol, mg/dL               | .58                 | -12.7 (-33.5, 8.2) | .23 | 2.5 (-18.1, 23.1) | .81 | -4.8 (-25.4, 15.9) | .65 |
| HDL cholesterol, mg/dL                 | .36                 | -2.5 (-8.1, 3.0)   | .37 | 0.9 (-4.6, 6.4)   | .75 | -3.8 (-9.3, 1.7)   | .18 |
| LDL cholesterol, mg/dL                 | .93                 | -7.5 (-46.7, 31.7) | .71 | 5.6 (-33.2, 44.3) | .78 | 8.0 (-30.9, 46.9)  | .69 |



| Outcomes             | Intervention effect |                   |     |                     |     |                    |     |
|----------------------|---------------------|-------------------|-----|---------------------|-----|--------------------|-----|
|                      | Overall joint test  | 4 months          |     | 8 months            |     | 12 months          |     |
|                      | p                   | Beta (95% CI)     | p   | Beta (95% CI)       | p   | Beta (95% CI)      | p   |
| Triglycerides, mg/dL | .40                 | 2.0 (-57.6, 61.5) | .95 | -47.1 -106.0, 11.9) | .12 | -7.7 (-66.7, 51.3) | .80 |

Overall joint test tests whether there is an overall moderating effect by sex

**eTable 5.** Testing ASCVD Risk as a Moderator of the Intervention Effects on Outcomes by Including an Interaction Term Between Study Arm, Study Visit, and ASCVD Risk, With High ASCVD Risk Compared to Low/Moderate Risk (Reference Group)

| Outcomes                               | Intervention effect |                   |     |                    |     |                    |     |
|----------------------------------------|---------------------|-------------------|-----|--------------------|-----|--------------------|-----|
|                                        | Overall joint test  | 4 months          |     | 8 months           |     | 12 months          |     |
|                                        | p                   | Beta (95% CI)     | p   | Beta (95% CI)      | p   | Beta (95% CI)      | p   |
| <b>Primary outcome</b>                 |                     |                   |     |                    |     |                    |     |
| Systolic blood pressure, mm Hg         | .24                 | -6.3 (-14.9, 2.3) | .15 | -7.9 (-16.3, 0.6)  | .07 | -3.5 (-12.0, 5.0)  | .42 |
| <b>Secondary outcome</b>               |                     |                   |     |                    |     |                    |     |
| Non-HDL cholesterol, mg/dL             | .53                 | 5.1 (-12.5, 22.6) | .57 | 13.0 (-4.3, 30.4)  | .14 | 5.5 (-12.0, 23.1)  | .54 |
| <b>Tertiary outcomes</b>               |                     |                   |     |                    |     |                    |     |
| Hypertension treatment cascade         | .31                 |                   |     |                    |     |                    |     |
| Treated                                |                     | 1.8 (0.1, 24.0)   | .65 | 0.8 (0.0, 17.5)    | .89 | 0.3 (0.0, 3.6)     | .33 |
| At treatment goal                      |                     | 4.2 (0.3, 51.2)   | .26 | 2.2 (0.1, 44.0)    | .61 | 2.5 (0.2, 29.2)    | .47 |
| Hypercholesterolemia treatment cascade | .30                 |                   |     |                    |     |                    |     |
| Treated                                |                     | 11.4 (0.9, 147.7) | .06 | 6.2 (0.4, 99.2)    | .20 | 3.1 (0.2, 62.3)    | .45 |
| At treatment goal                      |                     | 1.7 (0.2, 17.7)   | .65 | 2.9 (0.2, 36.0)    | .40 | 6.4 (0.5, 91.1)    | .17 |
| <b>Exploratory outcomes</b>            |                     |                   |     |                    |     |                    |     |
| Total cholesterol, mg/dL               | .66                 | 2.8 (-15.1, 20.7) | .76 | 11.3 (-6.5, 29.0)  | .21 | 4.4 (-13.5, 22.3)  | .63 |
| HDL cholesterol, mg/dL                 | .46                 | -1.7 (-6.5, 3.2)  | .50 | -2.6 (-7.4, 2.2)   | .30 | -3.8 (-8.6, 1.0)   | .12 |
| LDL cholesterol, mg/dL                 | .12                 | 38.9 (4.5, 73.4)  | .03 | 12.9 (-21.0, 46.8) | .46 | -9.6 (-44.1, 25.0) | .59 |

| Outcomes             | Intervention effect |                    |     |                    |     |                    |     |
|----------------------|---------------------|--------------------|-----|--------------------|-----|--------------------|-----|
|                      | Overall joint test  | 4 months           |     | 8 months           |     | 12 months          |     |
|                      | p                   | Beta (95% CI)      | p   | Beta (95% CI)      | p   | Beta (95% CI)      | p   |
| Triglycerides, mg/dL | .63                 | 13.0 (-34.3, 60.3) | .59 | 13.1 (-33.8, 59.9) | .58 | 31.7 (-15.5, 79.0) | .19 |

Overall joint test tests whether there is an overall moderating effect by ASCVD risk

**eTable 6.** Testing Site as a Moderator of the Intervention Effects on Outcomes by Including an Interaction Term Between Study Arm, Study Visit, and Site, With Sites 2 and 3 Compared to Site 1 (Reference Group)

| Outcomes                       | Intervention effect |                   |     |                    |     |                   |     |
|--------------------------------|---------------------|-------------------|-----|--------------------|-----|-------------------|-----|
|                                | Overall joint test  | 4 months          |     | 8 months           |     | 12 months         |     |
|                                | p                   | Beta (95% CI)     | p   | Beta (95% CI)      | p   | Beta (95% CI)     | p   |
| <b>Primary outcome</b>         |                     |                   |     |                    |     |                   |     |
| Systolic blood pressure, mm Hg | .70                 |                   | .57 |                    | .80 |                   | .42 |
| SBP, Site B                    |                     | 2.8 (-6.7, 12.3)  | .57 | -2.6 (-12.1, 7.0)  | .59 | -4.6 (-14.1, 4.9) | .34 |
| SBP, Site C                    |                     | -2.7 (-12.6, 7.3) | .60 | 0.5 (-9.3, 10.2)   | .92 | -6.3 (-16.2, 3.6) | .21 |
| <b>Secondary outcome</b>       |                     |                   |     |                    |     |                   |     |
| Non-HDL cholesterol, mg/dL     | .82                 |                   | .93 |                    | .93 |                   | .39 |
| Non-HDL, Site B                |                     | 1.0 (-18.8, 20.8) | .92 | -3.0 (-23.0, 16.9) | .77 | 13.9 (-6.0, 33.8) | .17 |
| Non-HDL, Site C                |                     | 3.9 (-17.0, 24.8) | .72 | -3.5 (-23.9, 17.0) | .74 | 7.4 (-13.3, 28.1) | .48 |
| <b>Tertiary outcomes</b>       |                     |                   |     |                    |     |                   |     |
| Hypertension treatment cascade | .91                 |                   | .84 |                    | .53 |                   | .74 |
| Treated, Site B                |                     | Not est.          | .94 | 0.8 (0.0, 30.5)    | .90 | Not est.          | .98 |
| Treated, Site C                |                     | Not est.          | .94 | 0.5 (0.0, 12.5)    | .64 | Not est.          | .98 |
| At treatment goal, Site B      |                     | Not est.          | .93 | 3.9 (0.1, 138.9)   | .45 | Not est.          | .99 |
| At treatment goal, Site C      |                     | Not est.          | .94 | 1.3 (0.1, 32.5)    | .86 | Not est.          | .98 |

| Outcomes                               | Intervention effect |                    |     |                     |     |                    |      |
|----------------------------------------|---------------------|--------------------|-----|---------------------|-----|--------------------|------|
|                                        | Overall joint test  | 4 months           |     | 8 months            |     | 12 months          |      |
|                                        | p                   | Beta (95% CI)      | p   | Beta (95% CI)       | p   | Beta (95% CI)      | p    |
| Hypercholesterolemia treatment cascade | .12                 |                    | .95 |                     | .91 |                    | .01  |
| Treated, Site B                        |                     | 0.9 (0.0, 21.4)    | .92 | 1.3 (0.0, 43.0)     | .88 | 61.3 (1.5, 2423.9) | .03  |
| Treated, Site C                        |                     | 2.8 (0.1, 69.3)    | .54 | 0.3 (0.0, 11.5)     | .52 | 0.6 (0.0, 23.1)    | .76  |
| At treatment goal, Site B              |                     | 1.3 (0.1, 22.7)    | .86 | 1.7 (0.1, 41.1)     | .75 | 0.5 (0.0, 11.0)    | .64  |
| At treatment goal, Site C              |                     | 2.1 (0.1, 39.5)    | .62 | 0.6 (0.0, 14.6)     | .77 | 0.2 (0.0, 4.3)     | .33  |
| <b>Exploratory outcomes</b>            |                     |                    |     |                     |     |                    |      |
| Total cholesterol, mg/dL               | .98                 |                    | .98 |                     | .93 |                    | .74  |
| Total cholesterol, Site B              |                     | -1.5 (-21.7, 18.7) | .88 | -3.5 (-23.9, 16.8)  | .73 | 7.3 (-13.0, 27.6)  | .48  |
| Total cholesterol, Site C              |                     | 0.2 (-21.0, 21.5)  | .98 | -3.1 (-23.9, 17.7)  | .77 | 6.6 (-14.4, 27.7)  | .54  |
| HDL cholesterol, mg/dL                 | <b>.02</b>          |                    | .41 |                     | .84 |                    | .009 |
| HDL, Site B                            |                     | -2.9 (-8.2, 2.5)   | .29 | 1.5 (-3.9, 6.9)     | .59 | -8.0 (-13.3, -2.6) | .004 |
| HDL, Site C                            |                     | -3.5 (-9.1, 2.2)   | .23 | 1.3 (-4.2, 6.8)     | .64 | -1.3 (-6.9, 4.3)   | .64  |
| LDL cholesterol, mg/dL                 | .67                 |                    | .66 |                     | .90 |                    | .17  |
| LDL, Site B                            |                     | -1.6 (-38.9, 35.6) | .93 | -2.6 (-40.4, 35.1)  | .89 | 5.5 (-32.1, 43.0)  | .78  |
| LDL, Site C                            |                     | 16.1 (-24.3, 56.4) | .44 | 6.5 (-32.6, 45.6)   | .74 | 36.1 (-3.8, 76.0)  | .08  |
| Triglycerides, mg/dL                   | .41                 |                    | .29 |                     | .47 |                    | .89  |
| Triglycerides, Site B                  |                     | -7.1 (-64.7, 50.6) | .81 | -32.2 (-90.5, 26.0) | .28 | 14.1 (-43.9, 72.1) | .63  |

| Outcomes              | Intervention effect |                     |     |                     |     |                   |     |
|-----------------------|---------------------|---------------------|-----|---------------------|-----|-------------------|-----|
|                       | Overall joint test  | 4 months            |     | 8 months            |     | 12 months         |     |
|                       | p                   | Beta (95% CI)       | p   | Beta (95% CI)       | p   | Beta (95% CI)     | p   |
| Triglycerides, Site C |                     | 39.8 (-21.0, 100.7) | .20 | -31.0 (-90.6, 28.5) | .31 | 8.1 (-52.1, 68.4) | .79 |

Overall joint test tests whether there is an overall moderating effect by site. Not est. = not estimable, valid estimates not available in some of the multinomial regression models

**eTable 7.** Intervention Effects Stratified by Treating Physician (EXTRA-CVD Investigator or Not)

| Outcomes                               | Intervention effects  |                  |                                     |            |                                      |            |                                      |            |                       |          |                                      |                  |
|----------------------------------------|-----------------------|------------------|-------------------------------------|------------|--------------------------------------|------------|--------------------------------------|------------|-----------------------|----------|--------------------------------------|------------------|
|                                        | 4 months              |                  |                                     |            | 8 months                             |            |                                      |            | 12 months             |          |                                      |                  |
|                                        | Study clinician       |                  | None                                |            | Study clinician                      |            | None                                 |            | Study clinician       |          | None                                 |                  |
|                                        | Beta<br>(95% CI)      | <i>p</i>         | Beta<br>(95% CI)                    | <i>p</i>   | Beta<br>(95% CI)                     | <i>p</i>   | Beta<br>(95% CI)                     | <i>p</i>   | Beta<br>(95% CI)      | <i>p</i> | Beta<br>(95% CI)                     | <i>p</i>         |
| <b>Primary outcome</b>                 |                       |                  |                                     |            |                                      |            |                                      |            |                       |          |                                      |                  |
| Systolic blood pressure, mm Hg         | -7.3<br>(-15.8, 1.2)  | .09              | <b>-5.6</b><br><b>(-10.1, -1.2)</b> | <b>.01</b> | <b>-10.3</b><br><b>(-18.6, -2.0)</b> | <b>.01</b> | -1.0<br>(-5.4, 3.5)                  | .67        | 3.6<br>(-4.7, 11.8)   | .39      | <b>-6.3</b><br><b>(-10.7, -1.9)</b>  | <b>.006</b>      |
| <b>Secondary outcome</b>               |                       |                  |                                     |            |                                      |            |                                      |            |                       |          |                                      |                  |
| Non-HDL cholesterol, mg/dL             | -14.9<br>(-33.5, 3.6) | .11              | -5.7<br>(-15.0, 3.6)                | .23        | -12.2<br>(-30.4, 5.9)                | .19        | <b>-10.3</b><br><b>(-19.5, -1.0)</b> | <b>.03</b> | -14.6<br>(-32.7, 3.5) | .11      | <b>-17.6</b><br><b>(-26.9, -8.4)</b> | <b>&lt; .001</b> |
| <b>Tertiary outcomes</b>               |                       |                  |                                     |            |                                      |            |                                      |            |                       |          |                                      |                  |
| Hypertension treatment cascade         | OR<br>(95% CI)        | <i>p</i>         | OR<br>(95% CI)                      | <i>p</i>   | OR<br>(95% CI)                       | <i>p</i>   | OR<br>(95% CI)                       | <i>p</i>   | OR<br>(95% CI)        | <i>p</i> | OR<br>(95% CI)                       | <i>p</i>         |
| Treated                                | Not est.              | <b>&lt; .001</b> | 0.5<br>(0.1, 1.7)                   | .27        | Not est.                             | .82        | 1.4<br>(0.4, 5.8)                    | .61        | Not est.              | < .001   | 1.1<br>(0.3, 3.6)                    | .90              |
| At treatment goal                      | Not est.              | <b>&lt; .001</b> | 1.2<br>(0.4, 3.7)                   | .76        | Not est.                             | .81        | 2.0<br>(0.5, 7.5)                    | .31        | Not est.              | < .001   | 2.5<br>(0.8, 8.0)                    | .12              |
| Hypercholesterolemia treatment cascade | OR<br>(95% CI)        | <i>p</i>         | OR<br>(95% CI)                      | <i>p</i>   | OR<br>(95% CI)                       | <i>p</i>   | OR<br>(95% CI)                       | <i>p</i>   | OR<br>(95% CI)        | <i>p</i> | OR<br>(95% CI)                       | <i>p</i>         |
| Treated                                | 0.7<br>(0.1, 9.6)     | .79              | 1.5<br>(0.4, 6.6)                   | .57        | 1.9<br>(0.1, 27.1)                   | .65        | 1.4<br>(0.3, 7.1)                    | .67        | 1.3<br>(0.1, 21.1)    | .85      | 1.1<br>(0.2, 5.9)                    | .91              |
| At treatment goal                      | 1.4<br>(0.1, 19.4)    | .79              | 1.7<br>(0.5, 5.5)                   | .41        | 15.2<br>(1.0, 233.3)                 | .05        | 2.0<br>(0.5, 7.5)                    | .31        | 7.7<br>(0.5, 116.6)   | .14      | <b>6.9</b><br><b>(1.9, 25.7)</b>     | <b>.004</b>      |
| <b>Exploratory outcomes</b>            |                       |                  |                                     |            |                                      |            |                                      |            |                       |          |                                      |                  |

| Outcomes                 | Intervention effects   |          |                       |          |                        |          |                                      |            |                        |          |                                      |                  |
|--------------------------|------------------------|----------|-----------------------|----------|------------------------|----------|--------------------------------------|------------|------------------------|----------|--------------------------------------|------------------|
|                          | 4 months               |          |                       |          | 8 months               |          |                                      |            | 12 months              |          |                                      |                  |
|                          | Study clinician        |          | None                  |          | Study clinician        |          | None                                 |            | Study clinician        |          | None                                 |                  |
|                          | Beta<br>(95% CI)       | <i>p</i> | Beta<br>(95% CI)      | <i>p</i> | Beta<br>(95% CI)       | <i>p</i> | Beta<br>(95% CI)                     | <i>p</i>   | Beta<br>(95% CI)       | <i>p</i> | Beta<br>(95% CI)                     | <i>p</i>         |
| Total cholesterol, mg/dL | -10.3<br>(-29.7, 9.1)  | .30      | -6.2<br>(-15.6, 3.1)  | .19      | -9.5<br>(-28.5, 9.5)   | .32      | <b>-10.4</b><br><b>(-19.7, -1.1)</b> | <b>.03</b> | -11.4<br>(-30.4, 7.5)  | .24      | <b>-16.7</b><br><b>(-26.1, -7.4)</b> | <b>&lt; .001</b> |
| HDL cholesterol, mg/dL   | 3.3<br>(-0.9, 7.5)     | .12      | 0.1<br>(-2.6, 2.8)    | .93      | 1.5<br>(-2.6, 5.6)     | .47      | 1.9<br>(-0.8, 4.5)                   | .17        | 2.3<br>(-1.8, 6.5)     | .26      | 0.4<br>(-2.3, 3.1)                   | .77              |
| LDL cholesterol, mg/dL   | -12.4<br>(-28.6, 3.8)  | .13      | -1.1<br>(-21.5, 19.3) | .91      | -7.0<br>(-23.1, 9.0)   | .39      | -7.1<br>(-27.3, 13.0)                | .49        | -9.8<br>(-25.7, 6.1)   | .23      | -4.3<br>(-24.7, 16.1)                | .68              |
| Triglycerides, mg/dL     | -15.3<br>(-71.0, 40.4) | .59      | -9.9<br>(-36.7, 17.0) | .47      | -49.0<br>(-103.7, 5.7) | .08      | <b>-28.8</b><br><b>(-55.4, -2.1)</b> | <b>.03</b> | -22.1<br>(-76.8, 32.6) | .43      | <b>-30.5</b><br><b>(-57.3, -3.7)</b> | <b>.03</b>       |

Not est. = not estimable, valid estimates not available in some of the multinomial regression models



**eTable 8.** Adverse Events by Treatment Arm

| <b>Variable</b>                                            | <b>EXTRA-CVD Intervention</b> | <b>Education Control</b> |
|------------------------------------------------------------|-------------------------------|--------------------------|
| N, total number of participants                            | 149                           | 148                      |
| Total participants with $\geq 1$ AE                        | 60 (40.3%)                    | 55 (37.2%)               |
| Number of AE per participant, among all participants       |                               |                          |
| Mean (SD)                                                  | 0.7 (1.2)                     | 0.8 (1.6)                |
| Median (Q1, Q3)                                            | 0 (0, 1)                      | 0 (0, 1)                 |
| Number of AE per participant, among those with $\geq 1$ AE |                               |                          |
| Mean (SD)                                                  | 1.8 (1.2)                     | 2.3 (1.9)                |
| Median (Q1, Q3)                                            | 1 (1, 2)                      | 2 (1, 3)                 |
| N, total number of adverse events                          | 107                           | 125                      |
| Serious AE                                                 | 47 (43.9%)                    | 47 (37.6%)               |
| AE unexpected                                              | 39 (36.4%)                    | 44 (35.2%)               |
| AE grade                                                   |                               |                          |
| Mild (Grade 1)                                             | 11 (10.3%)                    | 12 (9.6%)                |
| Moderate (Grade 2)                                         | 30 (28.0%)                    | 44 (35.2%)               |
| Severe (Grade 3)                                           | 56 (52.3%)                    | 53 (42.4%)               |
| Life-threatening (Grade 4)                                 | 8 (7.5%)                      | 14 (11.2%)               |
| Death (Grade 5)                                            | 2 (1.9%)                      | 2 (1.6%)                 |
| AE related to study                                        |                               |                          |
| Not related                                                | 81 (75.7%)                    | 96 (76.8%)               |
| Unlikely to be related                                     | 22 (20.6%)                    | 26 (20.8%)               |
| Possibly related                                           | 1 (0.9%)                      | 3 (2.4%)                 |
| Probably related                                           | 2 (1.9%)                      | 0 (0.0%)                 |
| Definitely related                                         | 1 (0.9%)                      | 0 (0.0%)                 |

---

 AE, adverse event

**eTable 9.** Sensitivity Analysis of Intervention Effects on Primary, Secondary, and Tertiary Outcomes, Adjusted for Baseline Covariates Associated With Attrition<sup>a</sup>

| Outcomes                               | Intervention effect       |             |                             |             |                            |                  |
|----------------------------------------|---------------------------|-------------|-----------------------------|-------------|----------------------------|------------------|
|                                        | 4 months                  |             | 8 months                    |             | 12 months                  |                  |
| <b>Primary outcome</b>                 | Beta (95% CI)             | <i>p</i>    | Beta (95% CI)               | <i>p</i>    | Beta (95% CI)              | <i>p</i>         |
| Systolic blood pressure, mm Hg         | <b>-5.7 (-9.7, -1.7)</b>  | <b>.005</b> | -3.1 (-7.0, 0.9)            | .13         | -3.6 (-7.5, 0.4)           | .08              |
| <b>Secondary outcome</b>               | Beta (95% CI)             | <i>p</i>    | Beta (95% CI)               | <i>p</i>    | Beta (95% CI)              | <i>p</i>         |
| Non-HDL cholesterol, mg/dL             | <b>-8.7 (-17.1, -0.4)</b> | <b>.04</b>  | <b>-11.2 (-19.5, -2.9)</b>  | <b>.008</b> | <b>-17.6 (-25.9, -9.4)</b> | <b>&lt; .001</b> |
| <b>Tertiary outcomes</b>               | OR (95% CI)               | <i>p</i>    | OR (95% CI)                 | <i>p</i>    | OR (95% CI)                | <i>p</i>         |
| Hypertension treatment cascade         |                           |             |                             |             |                            |                  |
| Treated                                | 0.9 (0.3, 2.6)            | .80         | 1.5 (0.4, 5.6)              | .50         | 1.2 (0.4, 3.8)             | .70              |
| At treatment goal                      | 1.3 (0.5, 3.7)            | .61         | 2.6 (0.7, 8.9)              | .14         | 2.4 (0.8, 6.9)             | .12              |
| Hypercholesterolemia treatment cascade |                           |             |                             |             |                            |                  |
| Treated                                | 1.4 (0.4, 4.8)            | .55         | 1.6 (0.4, 5.8)              | .51         | 1.3 (0.3, 5.2)             | .68              |
| At treatment goal                      | 2.0 (0.7, 6.0)            | .20         | <b>3.8 (1.2, 12.2)</b>      | <b>.03</b>  | <b>8.8 (2.7, 28.2)</b>     | <b>&lt; .001</b> |
| <b>Exploratory outcomes</b>            | Beta (95% CI)             | <i>p</i>    | Beta (95% CI)               | <i>p</i>    | Beta (95% CI)              | <i>p</i>         |
| Total cholesterol, mg/dL               | -6.6 (-14.8, 1.5)         | .11         | <b>-9.4 (-17.5, -1.3)</b>   | <b>.02</b>  | <b>-15.2 (-23.4, -7.1)</b> | <b>&lt; .001</b> |
| HDL cholesterol, mg/dL                 | 1.1 (-1.2, 3.3)           | .36         | 1.8 (-0.4, 4.1)             | .11         | 1.0 (-1.2, 3.3)            | .37              |
| LDL cholesterol, mg/dL                 | -8.0 (-23.9, 7.8)         | .32         | -11.4 (-27.0, 4.1)          | .15         | -11.0 (-26.7, 4.7)         | .17              |
| Triglycerides, mg/dL                   | -12.4 (-36.5, 11.7)       | .31         | <b>-34.3 (-58.1, -10.5)</b> | <b>.005</b> | <b>-29.6 (-53.5, -5.7)</b> | <b>.02</b>       |

<sup>a</sup> Covariates associated with attrition were race, ethnicity, smoking status, mental health history, insurance status, and employment status. Sex was added as an additional covariate given the results of the moderation analyses. Covariates were tested for multicollinearity before entering into the final model
