# Supplementary material for: Nurse-Led Strategy to Improve Blood Pressure and Cholesterol Level Among People With HIV: A Randomized Clinical Trial
Source: PubMed Central journal article supplement (PMC10915684; doi:10.1001/jamanetworkopen.2023.56445), 2024-03-05
Supplement: jamanetwopen-e2356445-s003.pdf [file jamanetwopen-e2356445-s003.pdf]

## Data Sharing Statement

Longenecker. Nurse-Led Strategy to Improve Blood Pressure and Cholesterol Level Among People With HIV. *JAMA Netw Open*. Published March 05, 2024.

doi:10.1001/jamanetworkopen.2023.56445

### Data

**Data available:** Yes

**Data types:** Deidentified participant data

**How to access data:** [ctlongen@uw.edu](mailto:ctlongen@uw.edu)

**When available:** beginning date: 06-01-2025

### Supporting Documents

**Document types:** None

### Additional Information

**Who can access the data:** researchers whose proposed use of the data has been approved by the EXTRA-CVD publications committee

**Types of analyses:** for analyses approved by the EXTRA-CVD publications committee

**Mechanisms of data availability:** after approval of a proposal
